# Supplementary material for: An organolanthanide(iii) single-molecule magnet with an axial crystal-field: influence of the Raman process over the slow relaxation
Source: Royal Society of Chemistry journal article supplement (doi:10.1039/c7cc02213a), 2017-01-01
Supplement: c7cc02213a1.pdf [file c7cc02213a1.pdf]

## SUPPORTING INFORMATION

### **An Organolanthanide(III) Single-Molecule Magnet with an Axial Crystal-Field: Influence of the Raman Process Over the Slow Relaxation.**

**Jérôme Long,<sup>\*a</sup> Boris G. Shestakov,<sup>b</sup> Dan Liu,<sup>c</sup> Liviu F. Chibotaru,<sup>c</sup> Yannick Guari<sup>a</sup>, Anton V. Cherkasov,<sup>b</sup> Georgy K. Fukin,<sup>b</sup> Alexander A. Trifonov,<sup>\*b,d</sup> and Joulia Larionova.<sup>a</sup>**

<sup>a</sup> Institut Charles Gerhardt Montpellier, UMR 5253, Ingénierie Moléculaire et Nano-Objets, Université de Montpellier, ENSCM, CNRS, place E. Bataillon, 34095 Montpellier Cedex 5 (France). E-mail: jerome.long@umontpellier.fr

<sup>b</sup> Institute of Organometallic Chemistry of Russian Academy of Sciences, Tropinina 49, GSP-445, 630950, Nizhny Novgorod Russia.

<sup>c</sup> Theory of Nanomaterials Group and INPAC, Katholieke Universiteit Leuven, Celesijnenlaan, 200F, Heverlee, B-3001, Belgium.

<sup>d</sup> Institute of Organoelement compounds of Russian Academy of Sciences, Vavilova str. 28, 119334, Moscow, Russia. E-mail: trif@oimc.ras.ru

## Experimental

### Synthesis

**General Remarks.** All procedures were performed under vacuum using standard Schlenk and glove-box techniques. After drying over KOH, THF and DME were distilled from sodium benzophenone ketyl prior to use. Hexane and toluene were purified by distillation from sodium/triglyme benzophenone ketyl or CaH<sub>2</sub>. 2,6-*i*Pr<sub>2</sub>C<sub>6</sub>H<sub>3</sub>N=CH-CH=NC<sub>6</sub>H<sub>3</sub>Pri<sub>2</sub>-2,6,<sup>1</sup> anhydrous LnCl<sub>3</sub> were obtained following the published synthetic procedures.<sup>2</sup> All other commercially available chemicals were used after the appropriate purification. IR spectra were recorded on Bruker-Vertex 70 instrument as Nujol mulls. The UV-VIS spectra were recorded in evacuated quartz cuvettes on a Perkin-Elmer Lambda 25 spectrophotometer. Lanthanide metal analyses were carried out by complexometric titration.<sup>3</sup> Elemental analyses were performed by the Microanalytical laboratory of the Institute of Organometallic Chemistry of RAS.

**Synthesis of [Li(DME)<sub>3</sub>][(2,6-*i*Pr<sub>2</sub>C<sub>6</sub>H<sub>3</sub>NCHCHNC<sub>6</sub>H<sub>3</sub>*i*Pr<sub>2</sub>-2,6)<sub>2</sub>Dy] (1a).** A THF (20 mL) solution of [2,6-*i*Pr<sub>2</sub>C<sub>6</sub>H<sub>3</sub>NCHCHNC<sub>6</sub>H<sub>3</sub>*i*Pr<sub>2</sub>-2,6]Li<sub>2</sub>(THF)<sub>n</sub> obtained *in situ* from 2,6-*i*Pr<sub>2</sub>C<sub>6</sub>H<sub>3</sub>NCHCHNC<sub>6</sub>H<sub>3</sub>*i*Pr<sub>2</sub>-2,6 (0.810 g, 2.15 mmol) and Li (0.030 g, 4.30 mmol) was slowly added to a suspension of DyCl<sub>3</sub> (0.290 g, 1.08 mmol) in THF (5 mL) at room temperature and the reaction mixture was stirred for 10 h. The volatiles were evaporated and the solid residue was extracted with toluene (15 mL). The toluene extract was filtered, toluene was removed in vacuum. Recrystallization of the resulting solid from DME at -20 °C afforded yellow crystals of **1** (0.530 g, 40% yield). IR (KBr, Nujol):  $\nu = 1620$  (w), 1593 (m), 1540 (m), 1315 (m), 1257 (s), 1183 (w), 1101 (w), 1053 (s), 929 (w), 857 (m), 796 (m), 756 (m) cm<sup>-1</sup>; elemental analysis calcd. (%) for C<sub>65.89</sub>H<sub>106.71</sub>DyLiN<sub>4</sub>O<sub>6.94</sub> (1235.40 g·mol<sup>-1</sup>): C, 64.06; H, 8.70; N, 4.54; Dy, 13.15; found: C, 63.75; H, 8.47; N, 4.52; Dy, 12.90.

Recrystallization of the crude product from DME-hexane mixture at room temperature afforded **1b** in 63 %. Elemental analysis calcd. (%) for C<sub>68.5</sub>H<sub>112.5</sub>DyLiN<sub>4</sub>O<sub>6</sub> (1257.56): C, 65.42; H, 9.01; N, 4.45; Dy, 12.92; found: C, 65.79; H, 8.72; N, 4.13; Dy, 12.77.

**Synthesis of [Li(DME)<sub>3</sub>][(2,6-*i*Pr<sub>2</sub>C<sub>6</sub>H<sub>3</sub>NCHCHNC<sub>6</sub>H<sub>3</sub>*i*Pr<sub>2</sub>-2,6)<sub>2</sub>Tb] (2).** A THF (20 mL) solution of [2,6-*i*Pr<sub>2</sub>C<sub>6</sub>H<sub>3</sub>NCHCHNC<sub>6</sub>H<sub>3</sub>*i*Pr<sub>2</sub>-2,6]Li<sub>2</sub>(THF)<sub>n</sub> obtained *in situ* from 2,6-*i*Pr<sub>2</sub>C<sub>6</sub>H<sub>3</sub>NCHCHNC<sub>6</sub>H<sub>3</sub>*i*Pr<sub>2</sub>-2,6 (0.500 g, 1.33 mmol) and Li (0.019 g, 2.66 mmol) was slowly added to a suspension of TbCl<sub>3</sub> 0.17 g (0.64 mmol) in THF (15 mL) at room temperature and the reaction mixture was stirred for 48 h. The resulting dark-red solution was filtered, the solvent was evaporated in vacuum and the resulting solid residue was extracted with toluene (20 mL). The extracts were filtered, toluene was then evaporated in vacuum and the remaining solid was redissolved in DME (~2 mL). Slow condensation of hexane into the DME solution at 20 °C afforded yellow crystals of **1** (0.51 g, 60%). IR (Nujol, KBr, cm<sup>-1</sup>): 1628(w), 1588 (s), 1563 (m), 1325 (m), 1255 (m), 1113 (s), 1088 (s), 981 (m), 926 (m), 855 (m), 799 (s), 752 (m), 696 (m), 553 (m). Anal. Calcd for C<sub>69</sub>H<sub>114</sub>LiN<sub>4</sub>O<sub>7</sub>Tb (1277.50): C, 64.87; H, 8.99; N, 4.38; Tb, 12.43; found: C, 64.59; H, 8.79; N, 3.99; Tb 12.63.

**Synthesis of [Li(DME)<sub>3</sub>][(2,6-*i*Pr<sub>2</sub>C<sub>6</sub>H<sub>3</sub>NCHCHNC<sub>6</sub>H<sub>3</sub>*i*Pr<sub>2</sub>-2,6)<sub>2</sub>Er] (3).** A THF (20 mL) solution of [2,6-*i*Pr<sub>2</sub>C<sub>6</sub>H<sub>3</sub>NCHCHNC<sub>6</sub>H<sub>3</sub>*i*Pr<sub>2</sub>-2,6]Li<sub>2</sub>(THF)<sub>n</sub> obtained *in situ* from 2,6-*i*Pr<sub>2</sub>C<sub>6</sub>H<sub>3</sub>NCHCHNC<sub>6</sub>H<sub>3</sub>*i*Pr<sub>2</sub>-2,6 (0.700 g, 1.86 mmol) and Li (0.026 g, 3.72 mmol) was slowly

added to a suspension of  $\text{ErCl}_3$  (0.250 g, 0.91 mmol) in THF (15 mL) at room temperature and the reaction mixture was stirred for 48 h. The resulting dark-red solution was filtered, the solvent was evaporated in vacuum, the remaining solid residue was extracted with toluene (25 mL) and the extracts were filtered. After evaporation of toluene in vacuum the solid was dissolved in DME (~2 mL). Slow diffusion of hexane into the DME solution at 20 °C afforded orange crystals of **2** (0.67 g, 58%). IR (Nujol, KBr,  $\text{cm}^{-1}$ ): 1627(w), 1588 (s), 1261 (s), 1210 (w), 1118 (m), 1032 (s), 1006 (w), 925 (m), 860 (m), 794 (m), 755 (m), 698 (m), 551 (w). Anal. Calcd for  $\text{C}_6\text{H}_{109}\text{ErLiN}_4\text{O}_6$  (1240.78): C, 64.85; H, 8.85; N, 4.51; Er, 13.48; found: C, 64.66; H, 8.69; N, 4.32; Er, 13.83.

**Single-Crystal X-ray Diffraction.** The X-ray data for **1–3** was collected on *Bruker D8 Quest* (**1b**, **2**), *Agilent Xcalibur E* (**1a**, **3**) diffractometers ( $\text{MoK}_\alpha$  radiation,  $\omega$ -scans technique,  $\lambda = 0.71073 \text{ \AA}$ ,  $T = 100(2) \text{ K}$ ). The structures **1–3** were solved by direct and dual-space methods<sup>4</sup> and were refined by full-matrix least squares on  $F^2$  for all data using *SHELX*.<sup>5</sup> *CrysAlis PRO*<sup>6</sup> and *SADABS*<sup>7</sup> were used to perform area-detector scaling and absorption corrections. All non-hydrogen atoms were found from Fourier syntheses of electron density and were refined anisotropically. All hydrogen atoms were placed in calculated positions and were refined in the “riding” model with  $U_{\text{iso}}(\text{H}) = 1.2U_{\text{eq}}$  of their parent atoms ( $U_{\text{iso}}(\text{H}) = 1.5U_{\text{eq}}$  for  $\text{CH}_3$ -groups). Two *iPr*-groups in **2**, all 2,6-*iPr*<sub>2</sub>C<sub>6</sub>H<sub>3</sub>-fragments of anionic part  $[\text{Dy}(\text{DAD})_2]^-$  in **1a**, one *iPr*-group in **1b**, all DME molecules of cationic part  $[\text{Li}(\text{DME})_3]^+$  in **2** and **1a** disordered over two sites. Displacement parameters of equivalent atoms of disordered fragments were restrained with *RIGU*, *EADP* and *ISOR* instructions; bond distances in disordered fragments were restrained with *DFIX* and *SADI* instructions.

CCDC-1461678 (**1a**), 1476447 (**1b**), 1476449 (**2**), 1476448 (**3**), contain the supplementary crystallographic data for this paper. These data are provided free of charge by The Cambridge Crystallographic Data Centre.

### Magnetic Measurements

Magnetic susceptibility data were collected with a Quantum Design MPMS-XL SQUID magnetometer working between 1.8 – 350 K with the magnetic field up to 7 Tesla. The sample was prepared in a glove box. The data were corrected for the sample holder and the diamagnetic contributions calculated from the Pascal's constants.

### Computational Details.

All calculations were carried out with MOLCAS 8.0 and are of CASSCF/RASSI/SINGLE\_ANISO type. Structures of **1a**, **2** and **3** and are shown below.

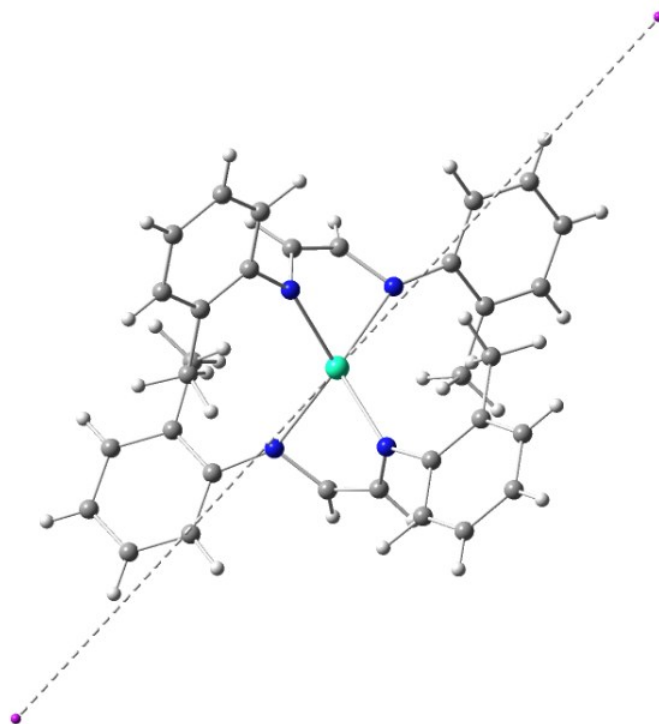

Structure of the  $\text{Li}(\text{DME})_3[\text{Dy}(\text{DAD})_2]$  complex **1a**. The dashed line shows the main anisotropy axis of the ground state.

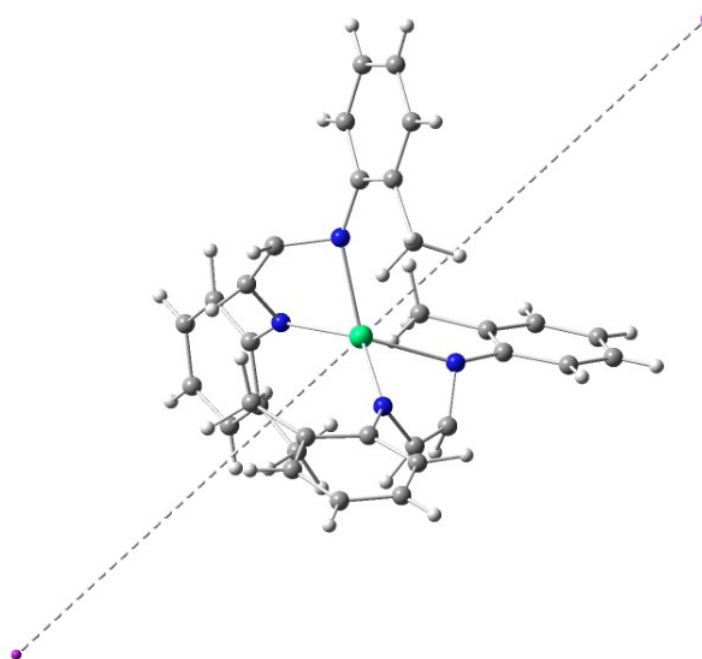

Structure of the  $\text{Li}(\text{DME})_3[\text{Er}(\text{DAD})_2]$  complex **3**. The dashed line shows the main anisotropy axis of the ground state.

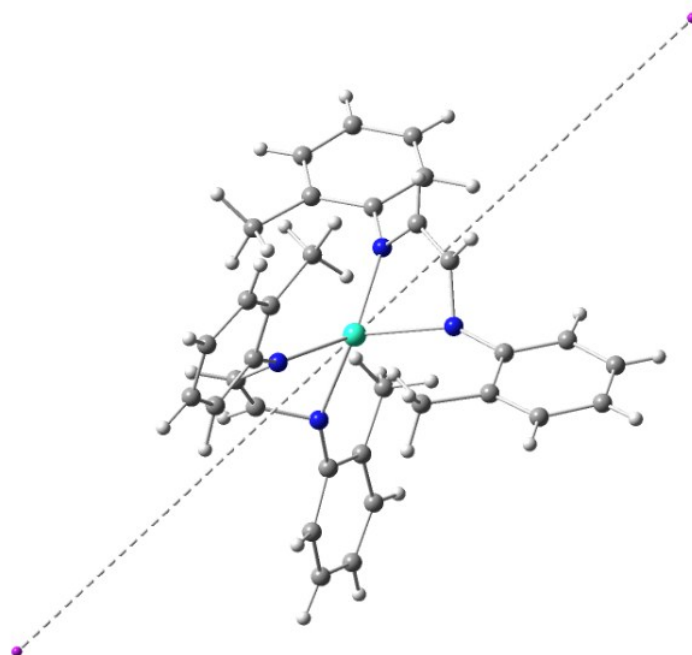

Structure of the  $\text{Li}(\text{DME})_3[\text{Tb}(\text{DAD})_2]$  complex **2** complex. The dashed line shows the main anisotropy axis of the ground state.

The Dy, Er and Tb centers were calculated omitting atoms far away from the center and using the experimentally determined coordinates of atoms.

Two basis set approximations have been employed: **1** Basis– small, and **2** Basis– large. Tables 1-4 show the contractions of the employed basis sets for all elements for **1 - 3**.

Contractions of the employed basis sets in computational approximations for compound **1**.

| <b>Basis 1</b>           | <b>Basis 2</b>             |
|--------------------------|----------------------------|
| DY.ANO-RCC...7S6P4D2F1G. | DY.ANO-RCC...8S7P5D3F2G1H. |
| N.ANO-RCC...3S2P.        | N.ANO-RCC...3S2P1D.        |
| C.ANO-RCC...3S2P.        | C.ANO-RCC...3S2P.          |
| H.ANO-RCC...2S.          | H.ANO-RCC...2S.            |

Contractions of the employed basis sets in computational approximations for **3**.

| <b>Basis 1</b>           | <b>Basis 2</b>             |
|--------------------------|----------------------------|
| ER.ANO-RCC...7S6P4D2F1G. | ER.ANO-RCC...8S7P5D3F2G1H. |
| N.ANO-RCC...3S2P.        | N.ANO-RCC...3S2P1D.        |
| C.ANO-RCC...3S2P.        | C.ANO-RCC...3S2P.          |
| H.ANO-RCC...2S.          | H.ANO-RCC...2S.            |

Contractions of the employed basis sets in computational approximations for **2**.

| <b>Basis 1</b>           | <b>Basis 2</b>             |
|--------------------------|----------------------------|
| TB.ANO-RCC...7S6P4D2F1G. | TB.ANO-RCC...8S7P5D3F2G1H. |
| N.ANO-RCC...3S2P.        | N.ANO-RCC...3S2P1D.        |
| C.ANO-RCC...3S2P.        | C.ANO-RCC...3S2P.          |

H.ANO-RCC...2S.

H.ANO-RCC...2S.

Active space of the CASSCF method included 9 electrons in 7 orbitals for the Dy center (4*f* orbitals of Dy<sup>3+</sup> ion), 8 electrons in 7 orbitals for the Tb center (4*f* orbitals of Tb<sup>3+</sup> ion), 11 electrons in 7 orbitals for the Er center (4*f* orbitals of Er<sup>3+</sup> ion).

Considering the spin-orbit coupling, for the Dy center, the CASSCF calculation is executed at ground state(S=6) with all of the 21 configurations, the first excited state(S=4) with all of the 224 configurations and the second excited state(S=2) with all the 490 configurations. After the CASSCF calculation, the RASSI calculation of RAS state interaction is performed 21 configurations for the ground state(S=6); 128 configurations for the state (S=4) and 130 configurations for the state (S=2). For the Er center, both the CASSCF and RAS calculation are executed at the ground state (S=4) with all of the 35 configurations, the state S=2 with all of the 112 configurations. For the Tb center, the CASSCF calculation is executed at ground state (S=7) with all of 7 configurations, the first excited state (S=5) with all of the 140 configurations, the second excited state (S=3) with all of 588 configurations and the third excited state (S=1) with all of 490 configurations. The RASST calculation of RAS state interaction is performed 7 configurations for the ground state (S=7), 140 configurations for the first excited state (S=5), 113 configurations for the second excited state (S=3) and 123 configurations for the third excited state (S=1).

On the basis of the resulting spin-orbital multiplets SINGLE\_ANISO program computed local magnetic properties (*g*-tensors, magnetic axes, local magnetic susceptibility, etc.)

## Magnetic Properties

### DC magnetic properties of **1a**.

It has been noticed that the number of solvates DME molecules in **1a** may vary. The magnetic results have been obtained considering the presence of two solvates molecules. The temperature dependence of the magnetic susceptibility performed with an applied magnetic field of 1000 Oe for **1a** reveals that the room temperature  $\chi T$  value is equal to  $14.05 \text{ cm}^3 \cdot \text{K} \cdot \text{mol}^{-1}$ , which is close to the theoretical value of  $14.17 \text{ cm}^3 \cdot \text{K} \cdot \text{mol}^{-1}$  expected for one  $\text{Dy}^{3+}$  ion ( ${}^6\text{H}_{15/2}$ ,  $S = 5/2$ ,  $L = 5$ ) (Fig. S2). Upon cooling, a decrease of  $\chi T$  occurs due to the thermal depopulation of the Stark sub-levels to reach the value of  $10.05 \text{ cm}^3 \cdot \text{K} \cdot \text{mol}^{-1}$  at 1.8 K. The field dependence of the magnetization at 1.8 K reaches the values of  $5.26 \mu\text{B}$  at 7 T (Inset of Fig. S2) without a clear saturation.

### DC magnetic properties of **1b**.

The temperature dependence of the magnetic susceptibility performed with an applied magnetic field of 1000 Oe for **1b** reveals that the room temperature  $\chi T$  value is equal to  $14.32 \text{ cm}^3 \cdot \text{K} \cdot \text{mol}^{-1}$ , which is close to the theoretical value of  $14.17 \text{ cm}^3 \cdot \text{K} \cdot \text{mol}^{-1}$  expected for one  $\text{Dy}^{3+}$  ion ( ${}^6\text{H}_{15/2}$ ,  $S = 5/2$ ,  $L = 5$ ) (Fig. S2). Upon cooling, a decrease of  $\chi T$  occurs due to the thermal depopulation of the Stark sub-levels to reach the value of  $10.66 \text{ cm}^3 \cdot \text{K} \cdot \text{mol}^{-1}$  at 1.8 K. The field dependence of the magnetization at 1.8 K reaches the values of  $5.26 \mu\text{B}$  at 7 T (Inset of Fig. S2) without a clear saturation.

### Magnetic properties of **2**

The magnetic properties of the terbium analogue **2** were investigated. Similarly with  $\text{Dy}^{3+}$ , the  $\text{Tb}^{3+}$  ion exhibits an oblate electronic density. However this is a non-Kramers ions ( ${}^7\text{F}_6$  ground state). The room temperature value of  $\chi T$  measured for **2** is equal to  $11.23 \text{ cm}^3 \cdot \text{K} \cdot \text{mol}^{-1}$  which is close to the expected value of  $11.82 \text{ cm}^3 \cdot \text{K} \cdot \text{mol}^{-1}$  expected for a  $\text{Tb}^{3+}$  ion considering the free-ion approximation. The observed decrease of  $\chi T$  (Fig. S2) upon cooling is ascribed to the thermal depopulation of the Stark sub-levels. The field dependence of the magnetization at 1.8 K reaches the value of  $4.47 \mu\text{B}$  at 7 T (Inset of Fig. S2) without a clear saturation.

AC measurements were performed in order to check the occurrence of a slow relaxation of the magnetisation. While no significant out-of-phase signal is observed under a zero-dc field, applying weak dc fields induces the appearance of a frequency dependent peaks. The frequency dependence of  $\chi''$  at 1.8 K measured for various DC fields leads to the appearance of an out-of-phase component with the highest relaxation time found for a 900 Oe DC field (Fig. S12). A decrease of  $\tau$  is observed for higher field values, which can be ascribed to the occurrence of the direct relaxation process, which becomes predominant. Taking into account that for this low temperature (1.8 K), the Raman and Orbach processes can be neglected, the field dependence can be reproduced using a simple model recently updated by Zadrozny *et al.*<sup>8</sup> with  $\tau^{-1} = DH^2T + B_1/(1+B_2H^2) + K$  (Eq. 3) for which the first term accounts for the direct process (for non-Kramers-ion such as  $\text{Tb}^{3+}$ ), the second one stands for the QTM and the last one is a constant representing the field independent Orbach and Raman process. The obtained parameters are summarized in Table S10. The antagonist effect of the QTM and direct processes gives birth to the maximum observed in the field dependence of  $\tau$ . The magnitude of

the  $B_1$  and  $B_2$  parameters directly reflects the degree of mixing between the  $\pm m_j$  levels and consequently the QTM process.

The frequency dependence at different temperatures under this optimum field of 900 Oe reveals the presence of frequency dependent single peaks (Fig. S13). Their maxima shift to higher temperatures upon increasing frequencies, which clearly indicate a slow relaxation of the magnetisation with out-of-phase signals observed higher than 10 K. The Orbach barrier, estimated from the linear fit,  $\tau = \tau_0 \exp(\Delta_{Orbach}/kT)$ , gives the parameters  $\tau_0 = 6.41 \times 10^{-8}$  s and  $\Delta_{Orbach} = 21$  cm $^{-1}$ , confirming a field induced SIM behaviour.

A clear deviation from the linearity appears in the low temperature range (Fig. S14), reflecting the contribution of additional relaxation spin-phonon pathways, such as Raman or direct processes, which show various degree of dependency with temperature. In order to estimate their contribution and extracting a more accurate value of the  $\Delta_{Orbach}$  barrier, fitting of the temperature dependence of the relaxation time was performed using (Eq. 2) by fixing  $m = 7$  (value for non-Kramers ion)<sup>9</sup> and  $n = 1$  (usually found for direct process). The best fit gives  $\Delta_{Orbach} = 17$  cm $^{-1}$  with  $\tau_0 = 2.0 \times 10^{-5}$  s. The non-negligible values of the  $A$  and  $C$  parameters indicate contributions from both, Raman and direct processes (Table S7). A second method to obtain the value of  $\Delta_{Orbach}$  was also used: the temperature dependence of the relaxation time was fitted with a model taking into account the influence of the applied magnetic field with the following equation  $\tau^{-1} = DH^2T + B_1/(1+B_2H^2) + CT^m + \tau_0^{-1} \exp(-\Delta_{Orbach}/kT)$  (Eq. 4). To avoid over-parameterization, the parameters  $D$ ,  $B_1$  and  $B_2$  were fixed from the field dependence of the relaxation time. The obtained values of  $\Delta_{Orbach} = 12.2$  cm $^{-1}$  and the  $C$  parameter (Table S11) are very close to those found with Eq. 2. Cole-Cole plots (Figure S15) and their fitting with a generalized Debye function indicates a very narrow distribution of the relaxation time for the high temperature region ( $\alpha = 0.02$ ), while the value of the  $\alpha$  parameter increase to 0.235 upon cooling at 1.8 K, confirming the occurrence of others relaxation processes (Table S12).

### Magnetic properties of 3.

In contrast with the Tb $^{3+}$  and Dy $^{3+}$  ions, the Er $^{3+}$  ion exhibits a prolate electronic density. The room temperature value of  $\chi T$  is equal to 11.06 cm $^3$ .K.mol $^{-1}$ , which is close to the expected value of 11.48 cm $^3$ .K.mol $^{-1}$  expected for a Er $^{3+}$  ion considering the free-ion approximation. The observed decrease of  $\chi T$  upon cooling is ascribed to the thermal depopulation of the Stark sub-levels. The field dependence of the magnetization at 1.8 K reaches values of 5.59  $\mu$ B at 7 T without a clear saturation (Inset of Fig. S2). No out-of-phase signals could be detected at 1.8 K under a zero dc field. Applying weak dc fields shortcut the fast QTM and induces the appearance an out-of-phase susceptibility, but without the presence of a clear maximum (Fig. S17). The temperature dependence of  $\chi''$  under a 2500 Oe dc field confirms that the maximum is located lower than 1.8 K (Fig. S18), precluding an in-depth analysis of the relaxation process. Such results confirm that the DAD ligands are particularly adapted to stabilize the electronic density of oblate lanthanide ions.



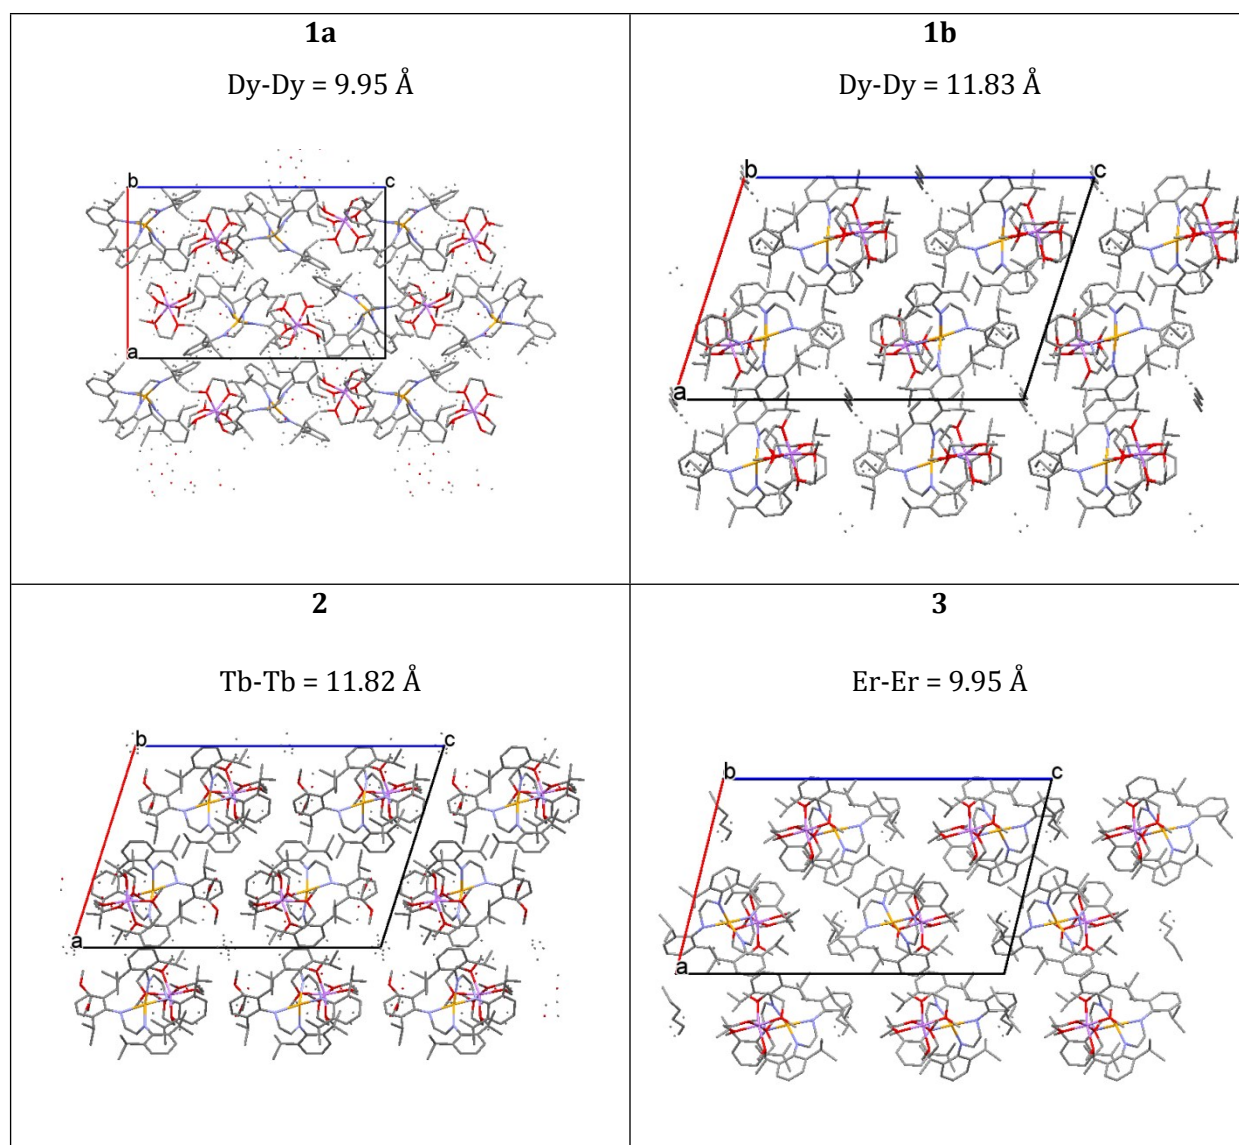

**Figure S1.** View of the packing arrangement of **1-3** along the *b* crystallographic axis.

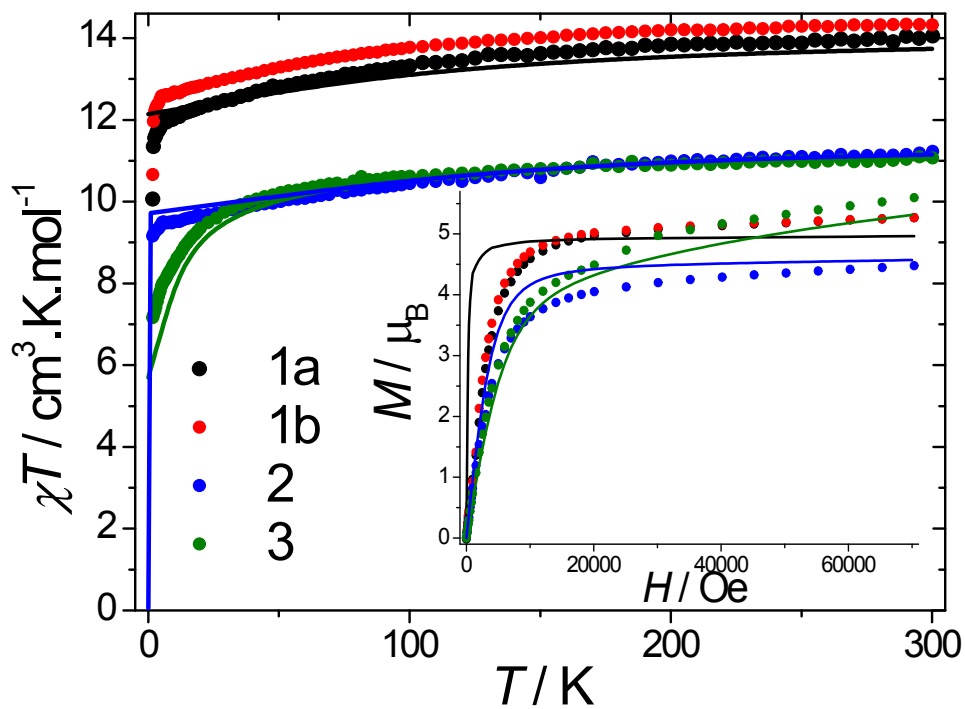

**Figure S2.** Temperature dependence of  $\chi T$  under a 1000 Oe DC field for **1a**, **1b**, **2**, **3**. The solid lines represent the calculated curves obtained by *ab initio* calculations (dowscaled by 3 and 2% for **2** and **3** respectively). Inset: Field dependence of the magnetisation at 1.8 K. The solid lines represent the calculated curves.

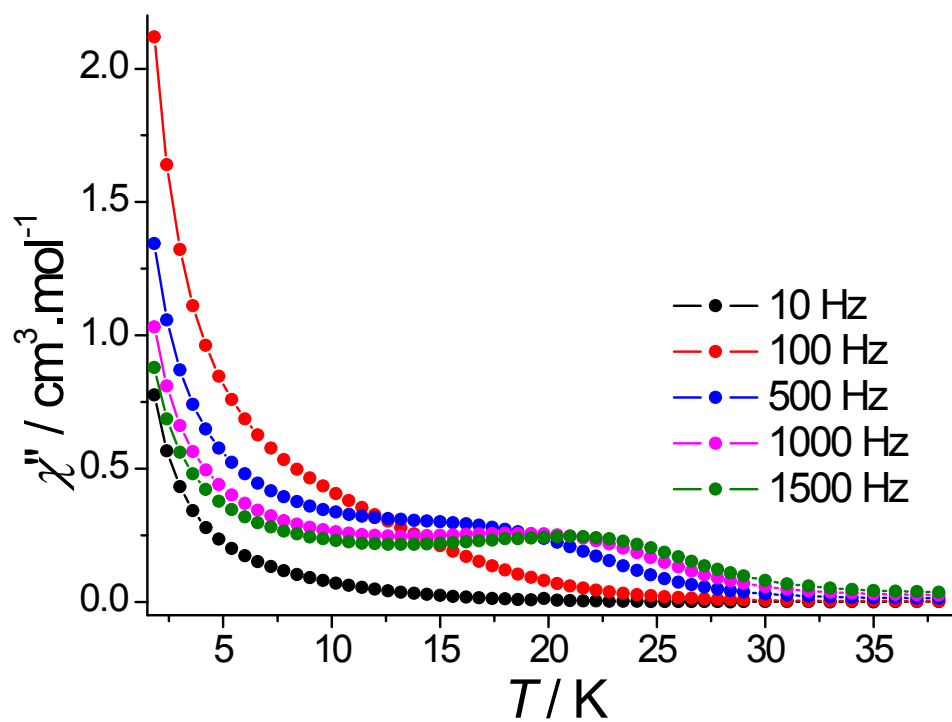

**Figure S3.** Temperature dependence of the out-of-phase susceptibility,  $\chi''$ , for different frequencies for **1a**.

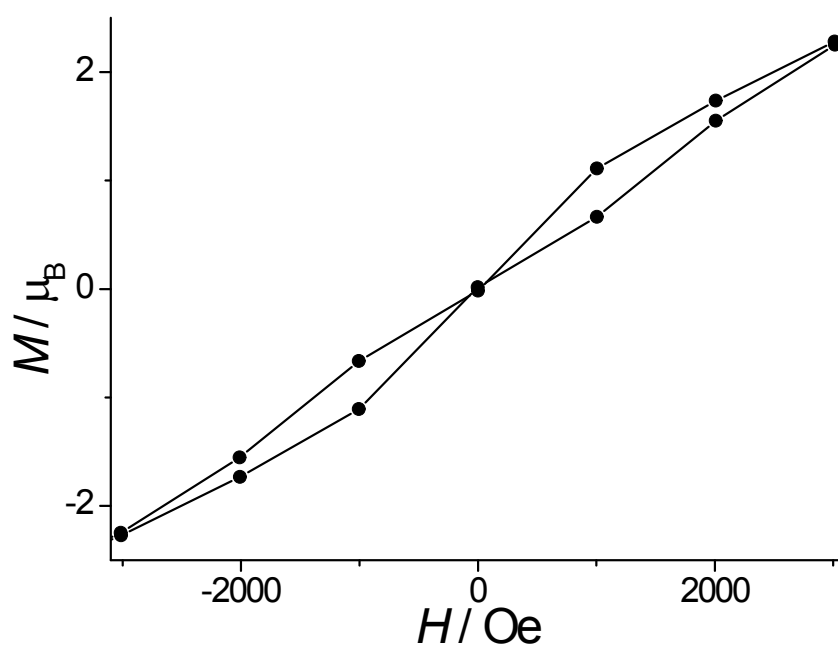

**Figure S4.** Hysteresis loop for **1a** performed at 1.8 K

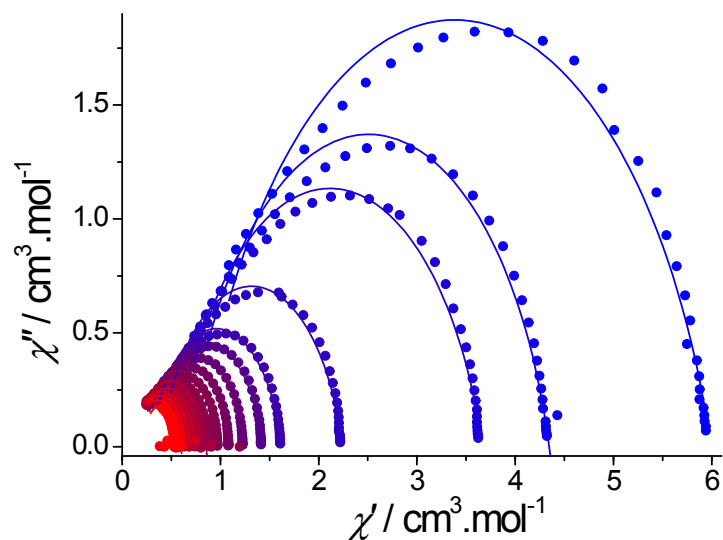

**Figure S5.** Cole-Cole (Argand) plot obtained using the ac susceptibility data (0 Oe) for **1a**. The solid lines correspond to the best fit obtained with a generalized Debye model.

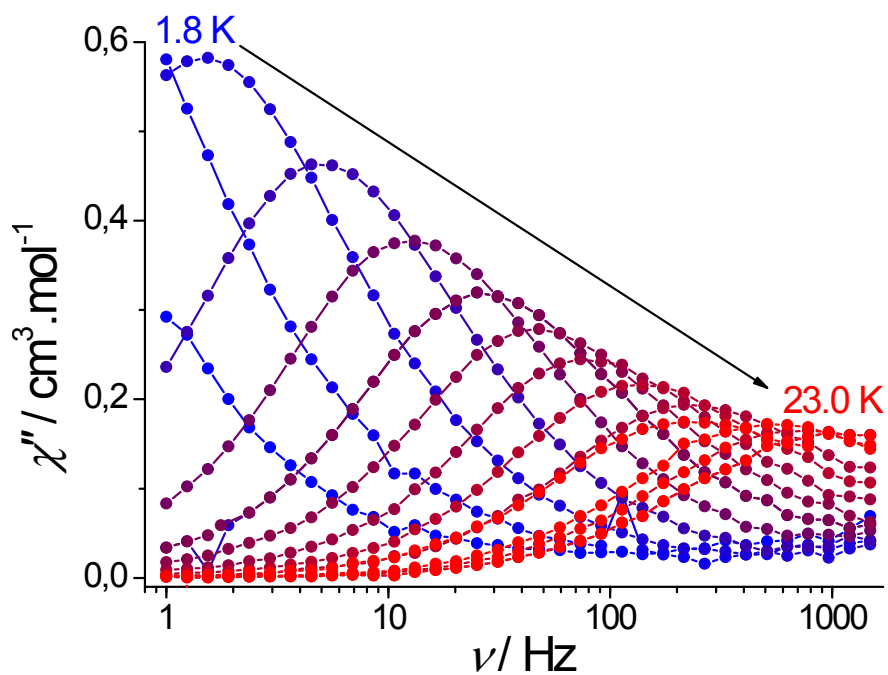

**Figure S6.** Frequency dependence of the out-of-phase susceptibility,  $\chi''$ , performed under a 3500 Oe DC field for **1a**.

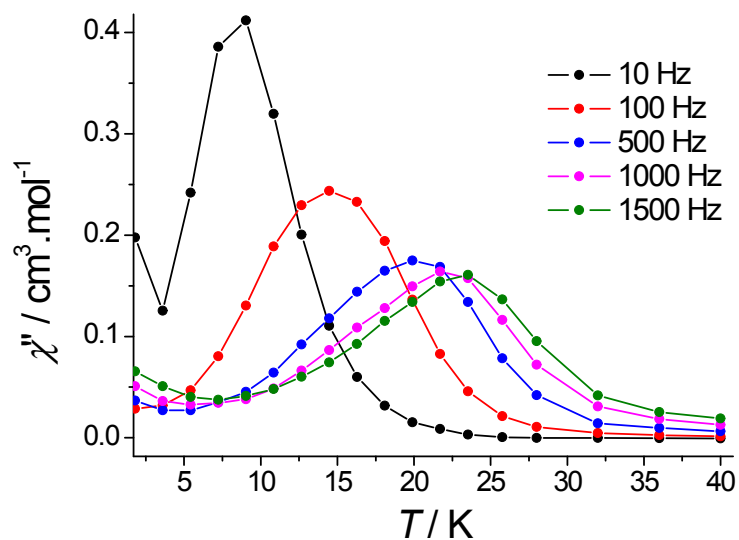

**Figure S7.** Temperature dependence of the out-of-phase susceptibility,  $\chi''$ , performed under a 3500 Oe DC field for **1a**.

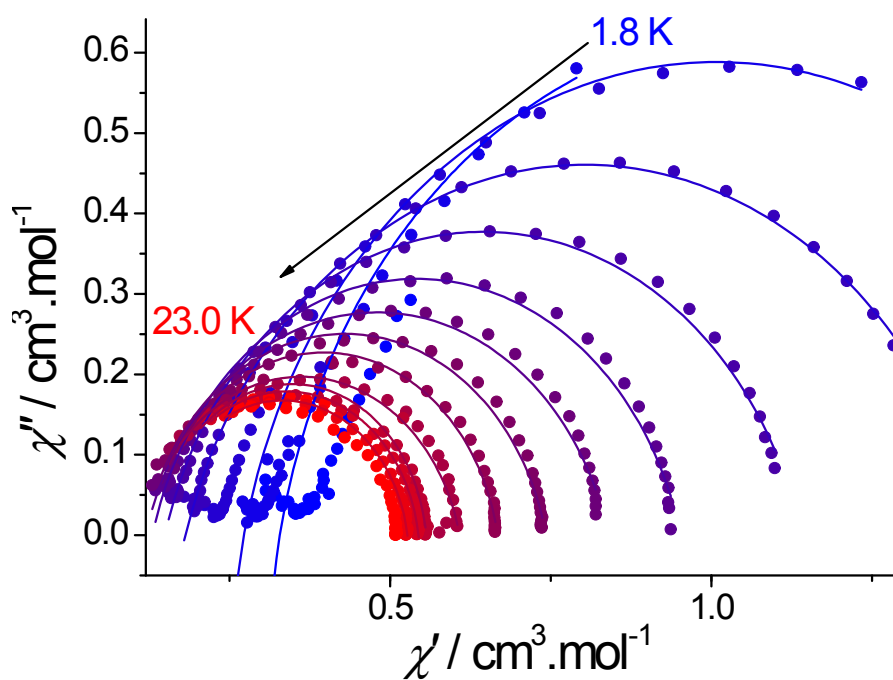

**Figure S8** Cole-Cole (Argand) plot obtained using the ac susceptibility data (3500 Oe) for **1a**. The solid lines correspond to the best fit obtained with a generalized Debye model.

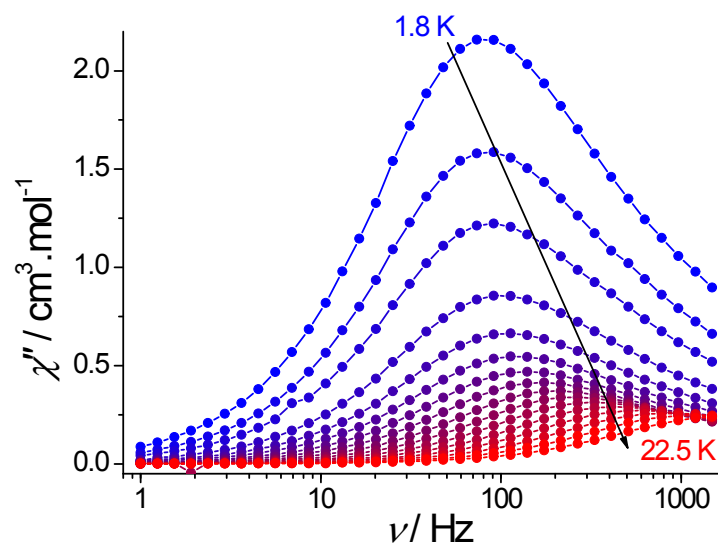

**Figure S9.** Frequency dependence of the out-of-phase susceptibility,  $\chi''$  performed under a zero DC field for **1b**.

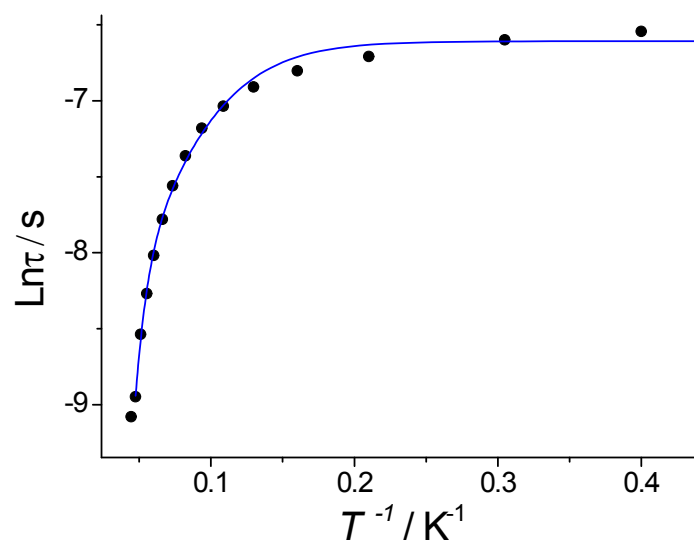

**Figure S10.** Temperature dependence of the relaxation time  $\tau$  for **1b**. The blue solid line represents the fit using Eq. 2.

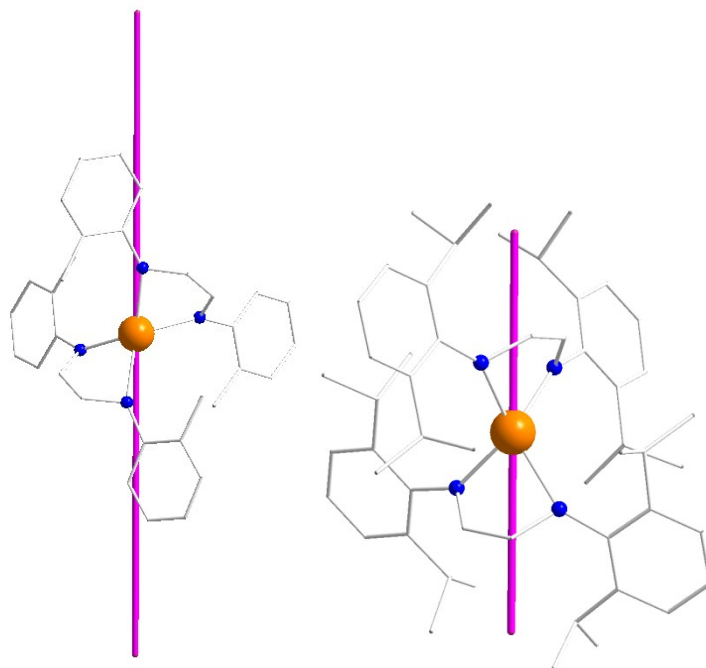

**Figure S11.** Orientation of the anisotropic axis (purple line) for **1a** obtained from *ab initio* calculations (left) and the MAGELLAN software (right).<sup>10</sup>

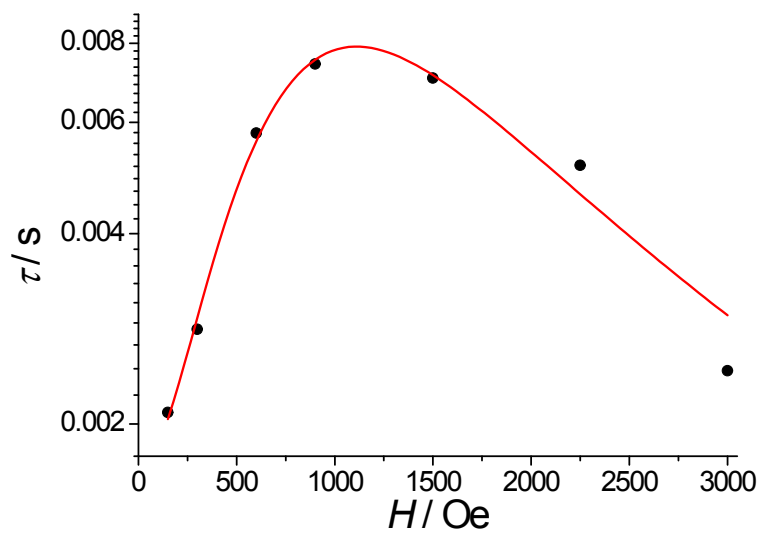

**Figure S12.** Field dependence of the relaxation time at 1.8 K for **2**. The red solid lines represent the best fit using Eq. 1.

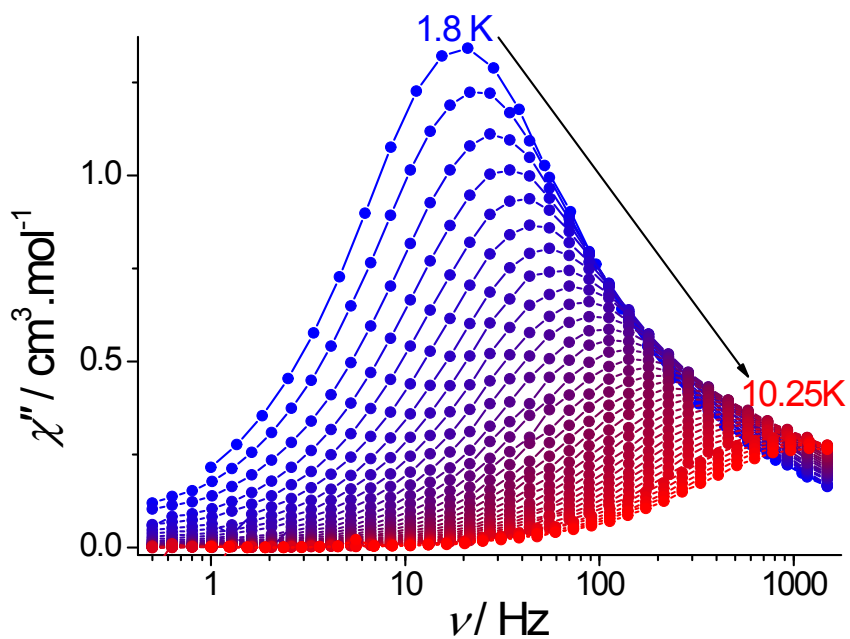

**Figure S13.** Frequency dependence of the out-of-phase susceptibility,  $\chi''$ , performed under a 900 Oe DC field for **2**.

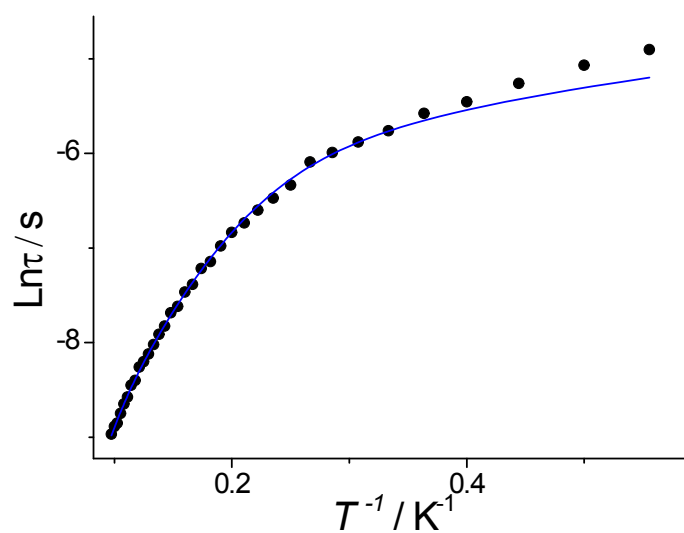

**Figure S14.** Temperature dependence of the relaxation time for **2**. The blue solid line represents the best fit using Eq. 2.



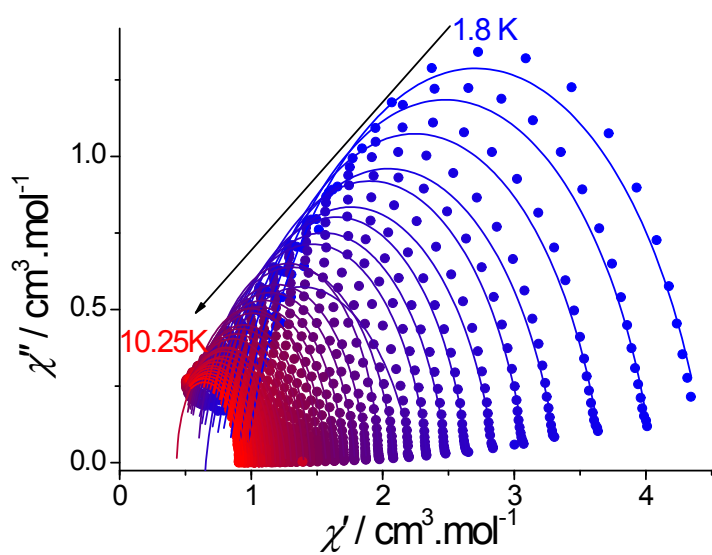

**Figure S15.** Cole-Cole (Argand) plot obtained using the ac susceptibility data (900 Oe) for **2**. The solid lines correspond to the best fit obtained with a generalized Debye model.

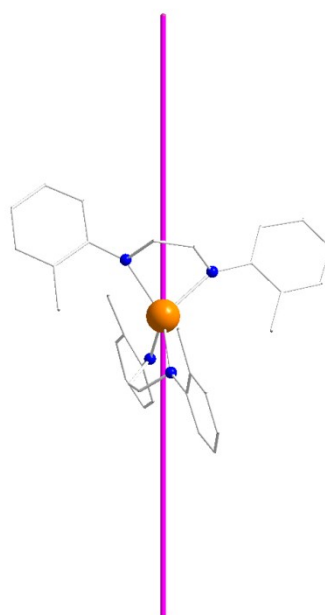

**Figure S16.** Orientation of the anisotropic axis (purple line) for **2** obtained from *ab initio* calculations.

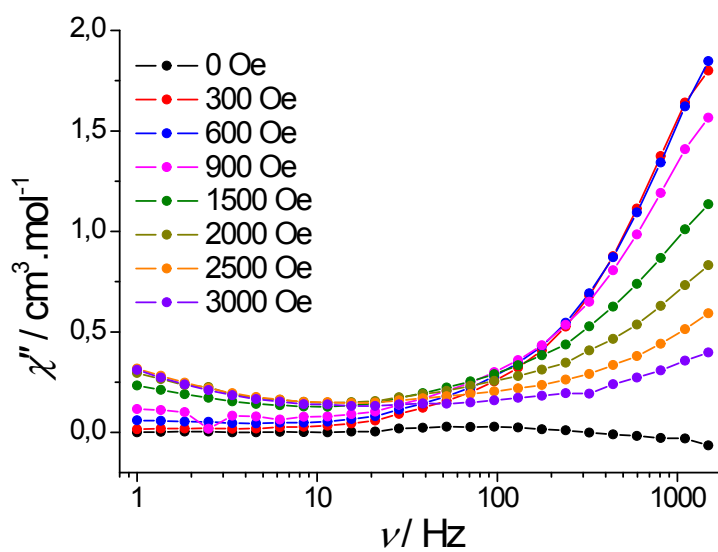

**Figure S17** Frequency dependence of the out-of-phase susceptibility,  $\chi''$ , at 1.8 K for different DC fields for **3**.

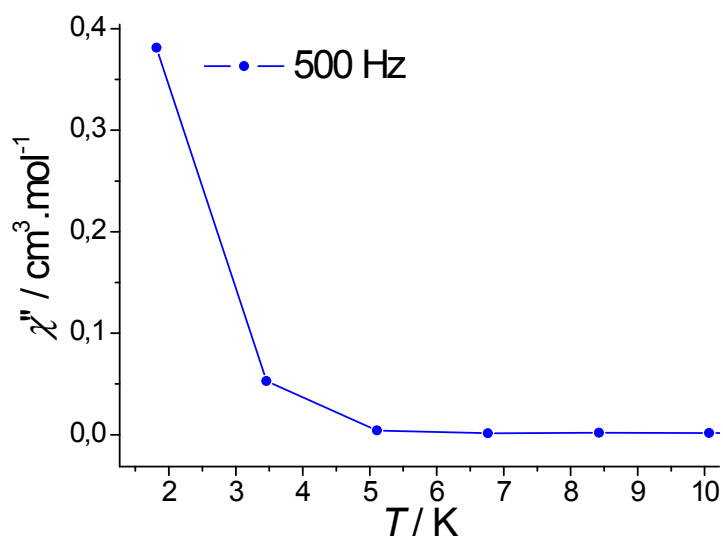

**Figure S18.** Temperature dependence of the out-of-phase susceptibility,  $\chi''$ , under a 2500 DC field for **3**.

**Table S1.** Crystallographic data and structural refinement details for **1–3**.

|                                                             | <b>1a</b>                                                                   | <b>1b</b>                                                              | <b>2</b>                                                            | <b>3</b>                                                           |
|-------------------------------------------------------------|-----------------------------------------------------------------------------|------------------------------------------------------------------------|---------------------------------------------------------------------|--------------------------------------------------------------------|
| Empirical formula                                           | C <sub>65.89</sub> H <sub>106.71</sub> DyLiN <sub>4</sub> O <sub>6.94</sub> | C <sub>68.5</sub> H <sub>112.5</sub> DyLiN <sub>4</sub> O <sub>6</sub> | C <sub>69</sub> H <sub>114</sub> LiN <sub>4</sub> O <sub>7</sub> Tb | C <sub>67</sub> H <sub>109</sub> ErLiN <sub>4</sub> O <sub>6</sub> |
| Formula weight                                              | 1235.40                                                                     | 1257.56                                                                | 1277.50                                                             | 1240.78                                                            |
| Crystal system                                              | Orthorhombic                                                                | Monoclinic                                                             | Monoclinic                                                          | Monoclinic                                                         |
| Space group                                                 | <i>P2<sub>1</sub>2<sub>1</sub>2<sub>1</sub></i>                             | <i>P2<sub>1</sub>/c</i>                                                | <i>P2<sub>1</sub>/c</i>                                             | <i>P2<sub>1</sub>/c</i>                                            |
| <i>a</i> , Å                                                | 16.12320(10)                                                                | 17.9746(9)                                                             | 18.126(3)                                                           | 16.8819(19)                                                        |
| <i>b</i> , Å                                                | 17.39480(10)                                                                | 15.7488(8)                                                             | 15.536(3)                                                           | 15.9384(13)                                                        |
| <i>c</i> , Å                                                | 24.3737(2)                                                                  | 26.9666(14)                                                            | 26.498(5)                                                           | 27.699(2)                                                          |
| $\alpha$ , °                                                | 90                                                                          | 90                                                                     | 90                                                                  | 90                                                                 |
| $\beta$ , °                                                 | 90                                                                          | 107.7100(10)                                                           | 107.529(3)                                                          | 103.719(9)                                                         |
| $\gamma$ , °                                                | 90                                                                          | 90                                                                     | 90                                                                  | 90                                                                 |
| Volume, Å <sup>3</sup>                                      | 6835.84(8)                                                                  | 7271.9(6)                                                              | 7115(2)                                                             | 7240.4(12)                                                         |
| <i>Z</i>                                                    | 4                                                                           | 4                                                                      | 4                                                                   | 4                                                                  |
| $\rho_{calc}$ , Mg/m <sup>3</sup>                           | 1.200                                                                       | 1.149                                                                  | 1.193                                                               | 1.138                                                              |
| Absorption coeff., mm <sup>-1</sup>                         | 1.143                                                                       | 1.074                                                                  | 1.044                                                               | 1.205                                                              |
| F(000)                                                      | 2618                                                                        | 2674                                                                   | 2720                                                                | 2632                                                               |
| Crystal size, mm                                            | 0.50×0.50×0.40                                                              | 0.37×0.23×0.15                                                         | 0.42×0.18×0.16                                                      | 0.35×0.20×0.07                                                     |
| $\theta$ range for data collection, °                       | 3.03–30.00                                                                  | 2.38–27.00                                                             | 2.36–25.03                                                          | 2.86–25.00                                                         |
| Index range                                                 | -22 ≤ <i>h</i> ≤ 22<br>-24 ≤ <i>k</i> ≤ 24<br>-34 ≤ <i>l</i> ≤ 34           | -22 ≤ <i>h</i> ≤ 22<br>-20 ≤ <i>k</i> ≤ 20<br>-34 ≤ <i>l</i> ≤ 34      | -21 ≤ <i>h</i> ≤ 21<br>-18 ≤ <i>k</i> ≤ 18<br>-31 ≤ <i>l</i> ≤ 31   | -19 ≤ <i>h</i> ≤ 20<br>-18 ≤ <i>k</i> ≤ 18<br>-32 ≤ <i>l</i> ≤ 32  |
| Reflections collected                                       | 159230                                                                      | 78191                                                                  | 58095                                                               | 59623                                                              |
| Independent reflections                                     | 19899                                                                       | 15758                                                                  | 12571                                                               | 12657                                                              |
| <i>R</i> <sub>int</sub>                                     | 0.041                                                                       | 0.0389                                                                 | 0.0815                                                              | 0.1073                                                             |
| Completeness to $\theta$ , %                                | 99.7                                                                        | 99.1                                                                   | 99.9                                                                | 99.3                                                               |
| GooF                                                        | 1.105                                                                       | 1.047                                                                  | 1.171                                                               | 1.030                                                              |
| <i>R</i> <sub>1</sub> ( <i>I</i> > 2 $\sigma$ ( <i>I</i> )) | 0.0397                                                                      | 0.0338                                                                 | 0.0883                                                              | 0.0575                                                             |
| <i>R</i> <sub>2</sub> (all data)                            | 0.1006                                                                      | 0.0893                                                                 | 0.2360                                                              | 0.1463                                                             |
| Largest diff. peak and hole, e/Å <sup>3</sup>               | 1.578 / -1.210                                                              | 1.630 / -0.855                                                         | 1.580 / -3.226                                                      | 2.044 / -0.701                                                     |

**Table S2.** Bond lengths, angles and SHAPE analysis in **1–3**.

|           | Ln-N (Å)          | Ln-C              | Centroids-Ln-Centroids angle (°) |
|-----------|-------------------|-------------------|----------------------------------|
| <b>1a</b> | 2.221(3)-2.256(3) | 2.672(4)-2.698(4) | 172.2                            |
| <b>1b</b> | 2.229(2)-2.254(2) | 2.673(2)-2.711(2) | 169.5                            |
| <b>2</b>  | 2.205(7)-2.256(6) | 2.652(8)-2.700(8) | 170.0                            |
| <b>3</b>  | 2.211(5)-2.244(4) | 2.653(6)-2.702(6) | 171.5                            |

  

|           | SP     | T     | SS    |
|-----------|--------|-------|-------|
| <b>1a</b> | 21.040 | 6.075 | 6.159 |
| <b>1b</b> | 19.644 | 6.273 | 6.404 |
| <b>2</b>  | 21.008 | 6.111 | 6.591 |
| <b>3</b>  | 22.031 | 5.079 | 6.346 |

**SP:** Square Planar  
**T:** Tetrahedron  
**SS:** Seesaw

**Table S3.** Fitting of the Cole-Cole plots with a generalized Debye model for temperature ranging from 1.8 to 22 K under a zero DC field for **1a**.

| $T$ (K) | $\alpha$ | $\chi_S$ (cm <sup>3</sup> . mol <sup>-1</sup> ) | $\chi_T$ (cm <sup>3</sup> . mol <sup>-1</sup> ) |
|---------|----------|-------------------------------------------------|-------------------------------------------------|
| 1.80    | 0.260    | 1.344                                           | 5.422                                           |
| 2.50    | 0.224    | 1.019                                           | 3.995                                           |
| 3.00    | 0.243    | 0.881                                           | 3.347                                           |
| 5.00    | 0.204    | 0.553                                           | 2.079                                           |
| 7.00    | 0.179    | 0.403                                           | 1.518                                           |
| 8.00    | 0.161    | 0.357                                           | 1.342                                           |
| 9.27    | 0.146    | 0.302                                           | 1.168                                           |
| 10.54   | 0.117    | 0.267                                           | 1.041                                           |
| 11.81   | 0.102    | 0.236                                           | 0.936                                           |
| 13.09   | 0.182    | 0.169                                           | 0.796                                           |
| 14.36   | 0.0466   | 0.197                                           | 0.789                                           |
| 15.63   | 0.0647   | 0.188                                           | 0.722                                           |
| 16.91   | 0.074    | 0.163                                           | 0.667                                           |

|       |        |       |       |
|-------|--------|-------|-------|
| 19.19 | 0.0669 | 0.155 | 0.623 |
| 19.45 | 0.128  | 0.136 | 0.571 |
| 20    | 0.005  | 0.215 | 0.581 |
| 22    | 0.0517 | 0.154 | 0.522 |

**Table S4.** Energies of the lowest Kramers doublets ( $\text{cm}^{-1}$ ) of Dy center.

| Spin-orbit energies, $\text{cm}^{-1}$ |           | Angles between the magnetic axes of the lowest and excited KDs, ( $^{\circ}$ ) |
|---------------------------------------|-----------|--------------------------------------------------------------------------------|
| Dy_basis1                             | Dy_basis2 |                                                                                |
|                                       |           | -                                                                              |
| 0.000                                 | 0.000     | 8.60842                                                                        |
| 245.236                               | 236.453   | 58.602                                                                         |
| 438.266                               | 410.703   | 54.802                                                                         |
| 501.062                               | 444.167   | 50.2658                                                                        |
| 584.614                               | 552.230   | 91.4544                                                                        |
| 634.508                               | 614.478   | 59.282                                                                         |
| 780.481                               | 750.834   | 89.7924                                                                        |
| 895.575                               | 894.952   |                                                                                |

**Table S5.** The  $g$  tensors of the two lowest Kramers doublets (KD) of Dy center.

| KD | Dy_basis1 |           | Dy_basis2 |           |
|----|-----------|-----------|-----------|-----------|
|    |           | $g$       |           | $g$       |
| 1  | $g_x$     | 0.002383  | $g_x$     | 0.004320  |
|    | $g_y$     | 0.006008  | $g_y$     | 0.007958  |
|    | $g_z$     | 19.724867 | $g_z$     | 19.707419 |
| 2  | $g_x$     | 0.124545  | $g_x$     | 0.095208  |
|    | $g_y$     | 0.130856  | $g_y$     | 0.101489  |

|          |       |           |           |
|----------|-------|-----------|-----------|
|          | $g_Z$ | 16.719800 | 16.690874 |
| <b>3</b> | $g_X$ | 0.861059  | 0.307556  |
|          | $g_Y$ | 0.883754  | 0.725234  |
|          | $g_Z$ | 13.321508 | 14.425136 |
| <b>4</b> | $g_X$ | 0.6289345 | 0.702353  |
|          | $g_Y$ | 1.144515  | 2.055076  |
|          | $g_Z$ | 17.371102 | 12.802994 |

**Table S6.** Fitting of the Cole-Cole plots with a generalized Debye model for temperature ranging from 1.8 to 22 K under a 3500 Oe DC field for **1a**.

| $T$ (K) | $\alpha$ | $\chi_S$ (cm <sup>3</sup> . mol <sup>-1</sup> ) | $\chi_T$ (cm <sup>3</sup> . mol <sup>-1</sup> ) |
|---------|----------|-------------------------------------------------|-------------------------------------------------|
| 3.84    | 0.143    | 0.426                                           | 1.774                                           |
| 6.00    | 0.163    | 0.376                                           | 1.638                                           |
| 7.95    | 0.229    | 0.302                                           | 1.303                                           |
| 10.00   | 0.205    | 0.237                                           | 1.053                                           |
| 12.00   | 0.189    | 0.197                                           | 0.885                                           |
| 13.79   | 0.196    | 0.180                                           | 0.779                                           |
| 15.59   | 0.162    | 0.161                                           | 0.698                                           |
| 17.40   | 0.125    | 0.155                                           | 0.639                                           |
| 19.19   | 0.164    | 0.150                                           | 0.573                                           |
| 21.00   | 0.071    | 0.152                                           | 0.542                                           |
| 21.50   | 0.094    | 0.152                                           | 0.526                                           |
| 22.15   | 0.103    | 0.156                                           | 0.509                                           |

**Table S7.** Fit parameters obtained using the equation  $\tau^{-1} = \tau_0^{-1} \exp(-\Delta/kT) + CT^m + AT^n + \tau_{\text{QTM}}^{-1}$

| Compound            | $\Delta_{\text{Orbach}}$ (cm <sup>-1</sup> )* | $\tau_0$ (s)*                  | $\Delta$ (cm <sup>-1</sup> ) | $\tau_0$ (s)                   | $A$ (s <sup>-1</sup> .K <sup>-1</sup> ) | $C$ (s <sup>-1</sup> .K <sup>-9</sup> ) | $C$ (s <sup>-1</sup> .K <sup>-7</sup> ) | $\tau_{\text{QTM}}$ (s)          |
|---------------------|-----------------------------------------------|--------------------------------|------------------------------|--------------------------------|-----------------------------------------|-----------------------------------------|-----------------------------------------|----------------------------------|
| <b>1a</b> (0 Oe)    | 43 ± 5                                        | (6.6 ± 0.3) × 10 <sup>-6</sup> | 30 ± 2                       | (3.1 ± 0.5) × 10 <sup>-6</sup> | -                                       | (3.0 ± 0.2) × 10 <sup>-9</sup>          | -                                       | (1.22 ± 0.06) × 10 <sup>-3</sup> |
| <b>1a</b> (3500 Oe) | 108 ± 5                                       | (2.0 ± 0.3) × 10 <sup>-7</sup> | 35 ± 5                       | (8 ± 3) × 10 <sup>-5</sup>     | 0 ± 4                                   | (2.31 ± 0.08) × 10 <sup>-11</sup>       | -                                       | -                                |
| <b>1b</b> (0 Oe)    | 49 ± 6                                        | (4.9 ± 0.3) × 10 <sup>-6</sup> | 21 ± 2                       | (9 ± 1) × 10 <sup>-5</sup>     | -                                       | (5.5 ± 0.2) × 10 <sup>-9</sup>          | -                                       | (1.35 ± 0.07) × 10 <sup>-3</sup> |
| <b>2</b> (900 Oe)   | 21 ± 1                                        | (6.4 ± 0.2) × 10 <sup>-6</sup> | 17 ± 1                       | (2.0 ± 0.3) × 10 <sup>-5</sup> | 100 ± 10                                | -                                       | (1.8 ± 0.2) × 10 <sup>-4</sup>          | -                                |

\*obtained from the linear fit using the high-temperature region

**Table S8.** Energies of the lowest doublets ( $\text{cm}^{-1}$ ) of Tb center.

| Spin-orbit energies, $\text{cm}^{-1}$ |           | Angles between the magnetic axes of the lowest and excited KDs, ( $^{\circ}$ ) |
|---------------------------------------|-----------|--------------------------------------------------------------------------------|
| Tb_basis1                             | Tb_basis2 |                                                                                |
| 0.000                                 | 0.000     | -                                                                              |
| 0.034                                 | 0.023     |                                                                                |
| 227.680                               | 257.182   | 45.4897                                                                        |
| 228.332                               | 257.319   |                                                                                |
| 323.263                               | 336.396   | 42.5286                                                                        |
| 324.069                               | 339.835   |                                                                                |
| 471.097                               | 481.968   | 44.4467                                                                        |
| 475.334                               | 495.914   |                                                                                |
| 560.293                               | 573.848   | 43.5371                                                                        |
| 669.515                               | 678.059   | 43.2284                                                                        |
| 697.717                               | 710.134   |                                                                                |
| 757.009                               | 749.984   | 60.6391                                                                        |
| 765.777                               | 762.084   |                                                                                |

**Table S9.** The  $g$  tensors of the two lowest doublets (KD) of Tb center.

| D |       | Tb_basis1<br>$g$ | Tb_basis2<br>$g$ |
|---|-------|------------------|------------------|
| 1 | $g_x$ | 0                | 0                |
|   | $g_y$ | 0                | 0                |
|   | $g_z$ | 17.887156        | 17.896861        |
| 2 | $g_x$ | 0                | 0                |
|   | $g_y$ | 0                | 0                |
|   | $g_z$ | 15.808805        | 15.536348        |
| 3 | $g_x$ | 0                | 0                |
|   | $g_y$ | 0                | 0                |
|   | $g_z$ | 11.976033        | 11.877624        |
| 4 | $g_x$ | 0                | 0                |
|   | $g_y$ | 0                | 0                |
|   | $g_z$ | 9.073788         | 9.358402         |

**Table S10.** Fit parameters of the field dependence of the relaxation time obtained using the Eq. 2 for **2** and **4**.

| <i>Compound</i> | $D$ ( $s^{-1}K^{-1}Oe^{-2}$ ) | $B_1$ ( $s^{-1}$ ) | $B_2$ ( $Oe^{-2}$ )   | $K$   |
|-----------------|-------------------------------|--------------------|-----------------------|-------|
| <b>2</b>        | $1.762 \times 10^{-5}$        | 541.28             | $9.52 \times 10^{-6}$ | 44.89 |

**Table S11.** Fit parameters of the field dependence of the relaxation time obtained using the Eq. 3 for **2**.

| <i>Compound</i>   | $\Delta_{Orbach}$ ( $cm^{-1}$ ) | $\tau_0$ (s)          | $C$ ( $s^{-1}.K^{-9}$ ) | $C$ ( $s^{-1}.K^{-7}$ ) | $D$ ( $s^{-1}K^{-1}Oe^2$ )* | $B_1$ ( $s^{-1}$ )* | $B_2$ ( $Oe^2$ )*     |
|-------------------|---------------------------------|-----------------------|-------------------------|-------------------------|-----------------------------|---------------------|-----------------------|
| <b>2</b> (900 Oe) | $12.2 \pm 0.5$                  | $3.77 \times 10^{-5}$ | -                       | $2.429 \times 10^{-4}$  | $1.762 \times 10^{-5}$      | 541.28              | $9.52 \times 10^{-6}$ |

**Table S12.** Fitting of the Cole-Cole plots with a generalized Debye model for temperature ranging from 1.8 to 10.25K under a 900 Oe DC field for **2**.

| $T$ (K) | $\alpha$ | $\chi_S$ ( $cm^3. mol^{-1}$ ) | $\chi_T$ ( $cm^3. mol^{-1}$ ) |
|---------|----------|-------------------------------|-------------------------------|
| 1.80    | 0.235    | 1.308                         | 4.10714                       |
| 2.00    | 0.220    | 1.188                         | 3.759                         |
| 2.25    | 0.216    | 1.080                         | 3.409                         |
| 2.50    | 0.226    | 1.000                         | 3.085                         |
| 2.75    | 0.190    | 0.910                         | 2.895                         |
| 3.00    | 0.203    | 0.857                         | 2.663                         |
| 3.25    | 0.156    | 0.791                         | 2.507                         |
| 3.50    | 0.162    | 0.746                         | 2.354                         |
| 3.75    | 0.149    | 0.702                         | 2.227                         |
| 4.00    | 0.322    | 0.757                         | 2.004                         |
| 4.25    | 0.143    | 0.627                         | 1.989                         |
| 4.50    | 0.038    | 0.617                         | 1.945                         |
| 4.75    | 0.112    | 0.582                         | 1.808                         |
| 5.00    | 0.104    | 0.559                         | 1.728                         |
| 5.25    | 0.100    | 0.540                         | 1.653                         |
| 5.50    | 0.093    | 0.521                         | 1.586                         |
| 5.75    | 0.087    | 0.505                         | 1.524                         |
| 6.00    | 0.006    | 0.491                         | 1.501                         |
| 6.25    | 0.080    | 0.477                         | 1.413                         |



|       |        |       |       |
|-------|--------|-------|-------|
| 6.50  | 0.065  | 0.464 | 1.369 |
| 6.75  | 0.064  | 0.453 | 1.321 |
| 7.00  | 0.061  | 0.443 | 1.278 |
| 7.25  | 0.138  | 0.418 | 1.208 |
| 7.50  | 0.057  | 0.423 | 1.200 |
| 7.75  | 0.053  | 0.416 | 1.164 |
| 8.00  | 0.020  | 0.440 | 1.142 |
| 8.25  | 0.055  | 0.397 | 1.097 |
| 8.50  | 0.057  | 0.389 | 1.066 |
| 8.75  | 0.085  | 0.368 | 1.029 |
| 9.00  | 0.039  | 0.382 | 1.012 |
| 9.25  | 0.0004 | 0.392 | 0.990 |
| 9.50  | 0.018  | 0.381 | 0.968 |
| 9.75  | 0.005  | 0.384 | 0.949 |
| 10.00 | 0.023  | 0.366 | 0.922 |
| 10.25 | 0.0004 | 0.381 | 0.906 |

**Table S13.** Energies of the lowest Kramers doublets ( $\text{cm}^{-1}$ ) of Er center.

| Spin-orbit energies, $\text{cm}^{-1}$ |           | Angles between the magnetic axes of the lowest and excited KDs, ( $^{\circ}$ ) |
|---------------------------------------|-----------|--------------------------------------------------------------------------------|
| Er_basis1                             | Er_basis2 |                                                                                |
| 0.000                                 | 0.000     | -                                                                              |
| 22.544                                | 27.694    | 8.49177                                                                        |
| 62.719                                | 82.869    |                                                                                |
| 111.773                               | 113.070   | 82.5903                                                                        |
| 214.127                               | 226.835   |                                                                                |

|         |         |         |
|---------|---------|---------|
| 287.078 | 301.041 | 86.0442 |
| 446.157 | 439.586 | 84.6532 |
|         |         | 89.6718 |
|         |         | 86.9124 |
|         |         | 86.4033 |

**Table S14.** The *g* tensors of the two lowest Kramers doublets (KD) of Er center.

| KD | Er_basis1      |           | Er_basis2 |          |
|----|----------------|-----------|-----------|----------|
|    |                | <i>g</i>  |           | <i>g</i> |
| 1  | g <sub>X</sub> | 1.317902  | 1.206265  |          |
|    | g <sub>Y</sub> | 5.785255  | 6.205133  |          |
|    | g <sub>Z</sub> | 12.442243 | 12.078836 |          |
| 2  | g <sub>X</sub> | 8.317705  | 1.256502  |          |
|    | g <sub>Y</sub> | 5.002762  | 4.672803  |          |
|    | g <sub>Z</sub> | 1.045869  | 8.520682  |          |
| 3  | g <sub>X</sub> | 0.080384  | 1.504798  |          |
|    | g <sub>Y</sub> | 3.475915  | 3.529860  |          |
|    | g <sub>Z</sub> | 13.180474 | 13.384534 |          |
| 4  | g <sub>X</sub> | 4.658639  | 3.616702  |          |
|    | g <sub>Y</sub> | 4.751195  | 4.581772  |          |
|    | g <sub>Z</sub> | 8.714168  | 8.822376  |          |

- 1 M. Svoboda and H. t. Dieck, *Journal of Organometallic Chemistry*, 1980, **191**, 321.
- 2 M. D. Taylor and C. P. Carter, *Journal of Inorganic and Nuclear Chemistry*, 1962, **24**, 387.
- 3 S. J. Lyle and M. M. Rahman, *Talanta*, 1963, **10**, 1177.
- 4 G. Sheldrick, *Acta Cryst. A*, 2015, **71**, 3.
- 5 G. Sheldrick, *Acta Cryst. C*, 2015, **71**, 3.
- 6 Agilent, *CrysAlis PRO*, 2014, Agilent Technologies Ltd, Yartnon, Oxfordshire, England.
- 7 Bruker, *SADABS*, 2001, Bruker AXS Inc., Madison, Wisconsin, USA.
- 8 J. M. Zadrozny, M. Atanasov, A. M. Bryan, C.-Y. Lin, B. D. Rekken, P. P. Power, F. Neese and J. R. Long, *Chem. Sci.*, 2013, **4**, 125.
- 9 P. L. Scott and C. D. Jeffries, *Phys. Rev.*, 1962, **127**, 32.
- 10 N. F. Chilton, D. Collison, E. J. L. McInnes, R. E. P. Winpenny and A. Soncini, *Nat. Commun.*, 2013, **4**.
